# Supplementary material
Source: Springer Nature journal article supplement (https://www.springermedizin.de/resource/supplementary/13584_2013_79_MOESM1_ESM.pdf/9676936)

### Number of beds

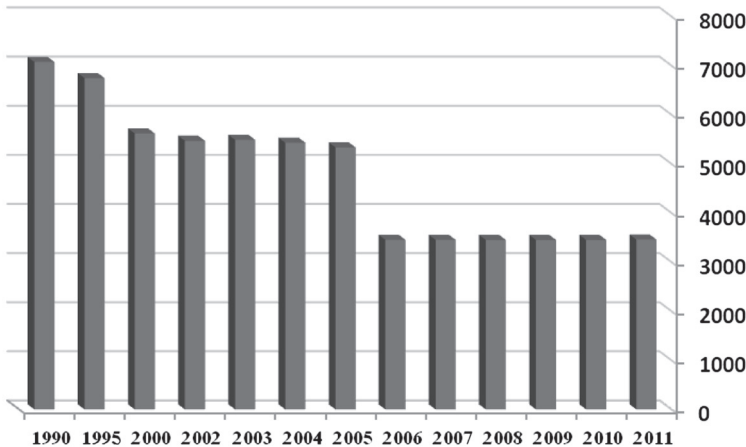

### Rates per 1,000 population

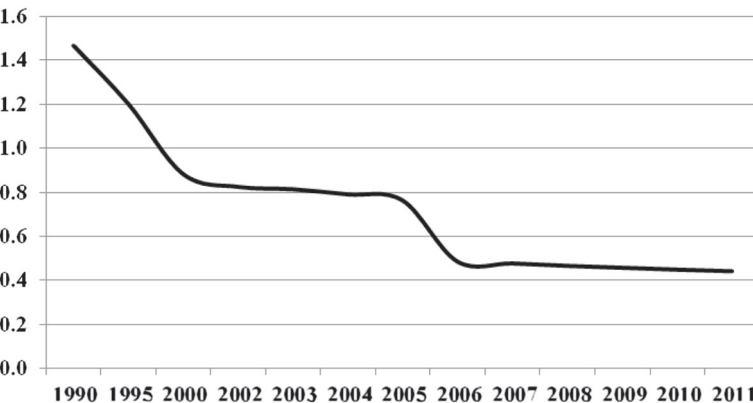

Supplement: MOESM1 [file 9676936]
